# Supplementary material for: Electrospun nanofibrous membranes of recombinant human collagen type III promote cutaneous wound healing
Source: Royal Society of Chemistry journal article supplement (doi:10.1039/d3tb00438d), 2023-01-01
Supplement: d3tb00438d1.pdf [file d3tb00438d1.pdf]

Supporting Information

**Electrospun Nanofibrous Membranes of Recombinant Human  
Collagen Type III Promotes Cutaneous Wound Healing**

Zuqin Dong,<sup>†ab</sup> Quanying Liu,<sup>†ab</sup> Xiaowen Han,<sup>ab</sup> Xinyue Zhang,<sup>c</sup> Xinyue Wang,<sup>d</sup>  
Chen Hu,<sup>ab</sup> Xing Li,<sup>ab</sup> Jie Liang,<sup>abc</sup> Yafang Chen<sup>\*ab</sup> and Yujiang Fan<sup>\*ab</sup>

<sup>a</sup> National Engineering Research Center for Biomaterials, Sichuan University, Chengdu, Sichuan 610064, China

<sup>b</sup> College of Biomedical Engineering, Sichuan University, Chengdu, Sichuan 610064, China

<sup>c</sup> Collaborative Innovation Center of Regenerative Medicine and Medical Biological Resources Development and Application, Guangxi Medical University, Nanning, Guangxi 530021, China

<sup>d</sup> West China School of Medicine, West China Hospital, Sichuan University, Chengdu, Sichuan 610041, China

<sup>e</sup> Sichuan Testing Center for Biomaterials and Medical Devices, Chengdu, Sichuan 610064, China

<sup>†</sup>Equal contribution

\*Corresponding author

E-mail: yafang.chen@scu.edu.cn, fan\_yujiang@scu.edu.cn

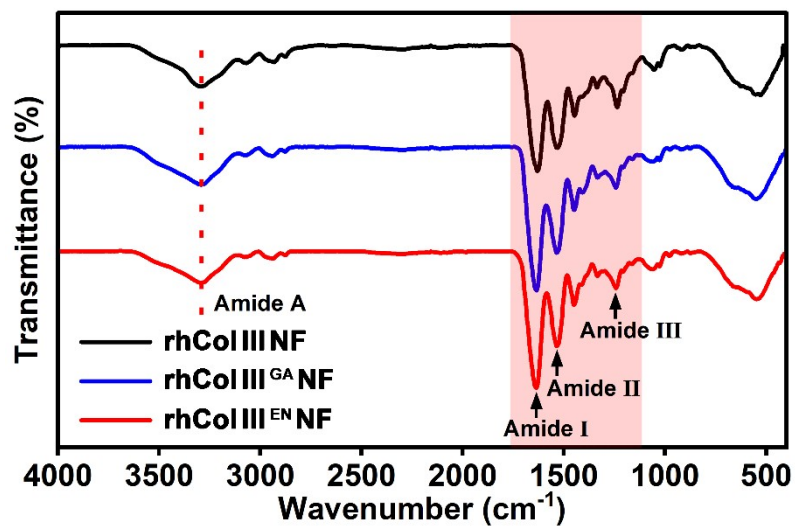

**Figure S1.** FTIR spectra of rhCol III NF, rhCol III<sup>GA</sup> NF and rhCol III<sup>EN</sup> NF.

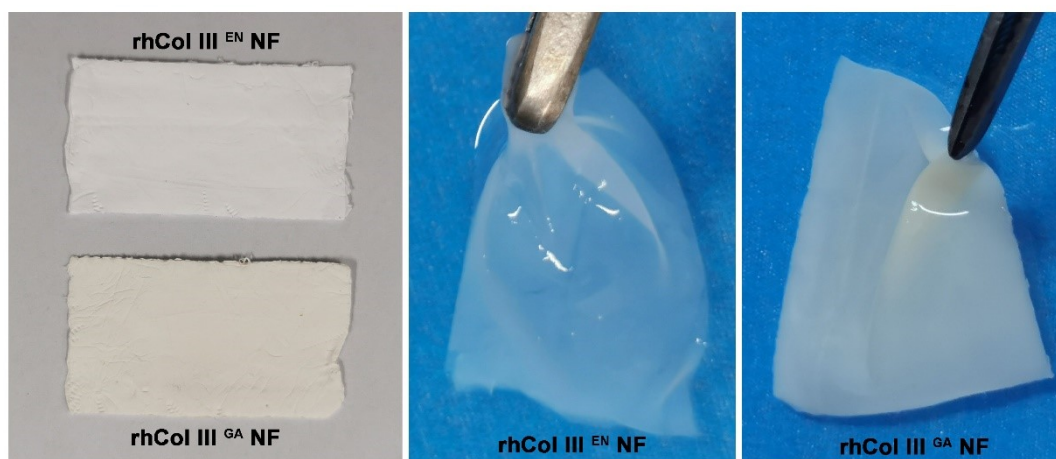

**Figure S2.** Images of the appearance of rhCol III<sup>GA</sup> NF and rhCol III<sup>EN</sup> NF, and their states in the water.

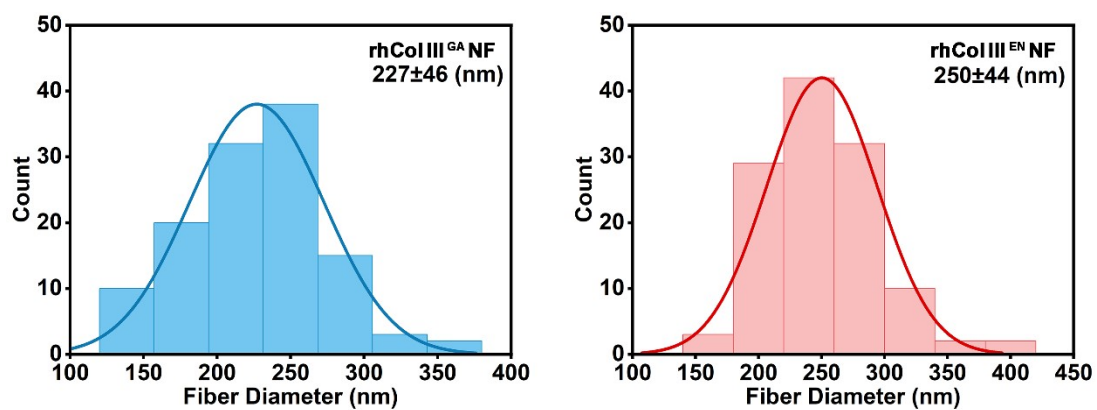

**Figure S3.** Diameter distribution of rhCol III<sup>GA</sup> NF and rhCol III<sup>EN</sup> NF.

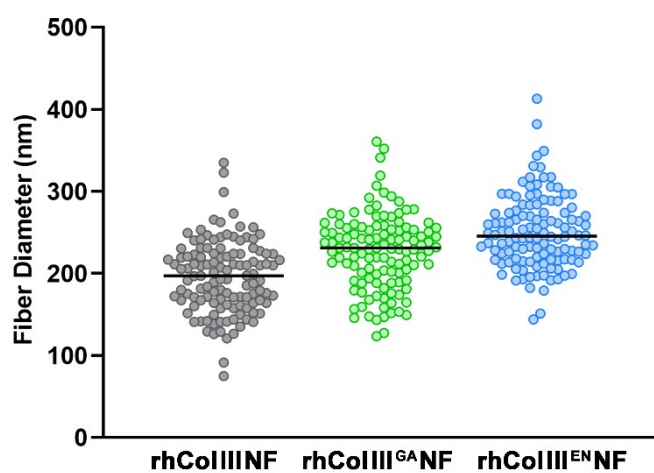

**Figure S4.** Comparison of the diameters of rhCol III, rhCol III<sup>GA</sup> NF and rhCol III<sup>EN</sup> NF.

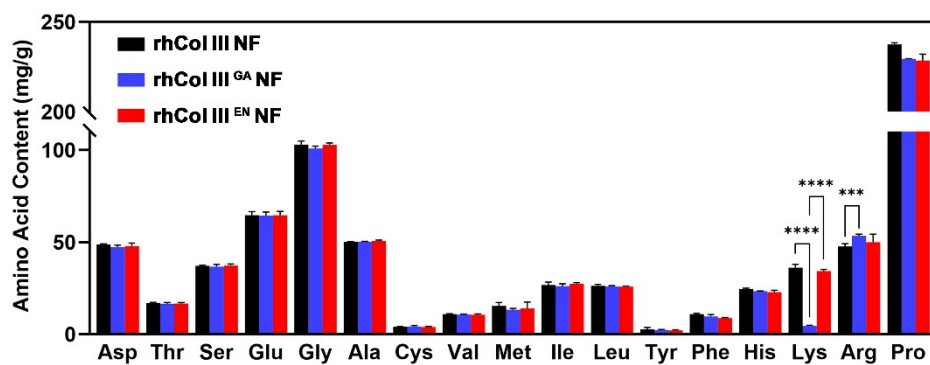

**Figure S5.** The amino acids content of rhCol III NF, rhCol III<sup>GA</sup> NF and rhCol III<sup>EN</sup> NF.

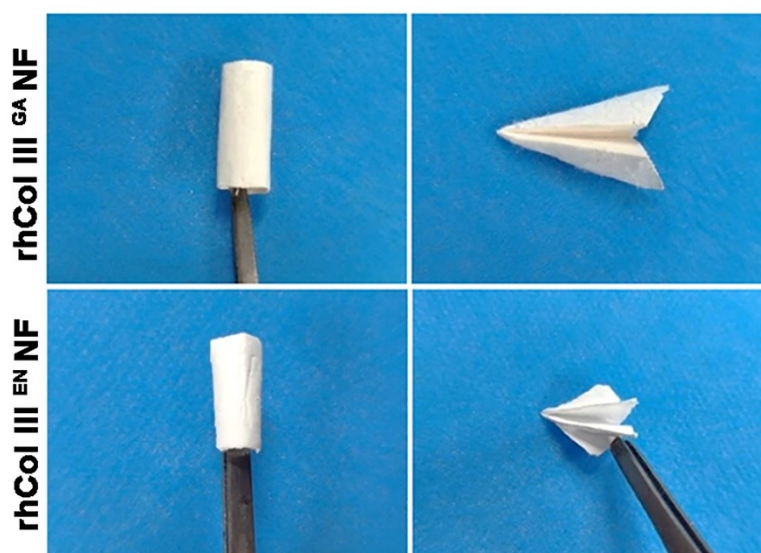

**Figure S6.** The flexibility and foldability of the membranes.

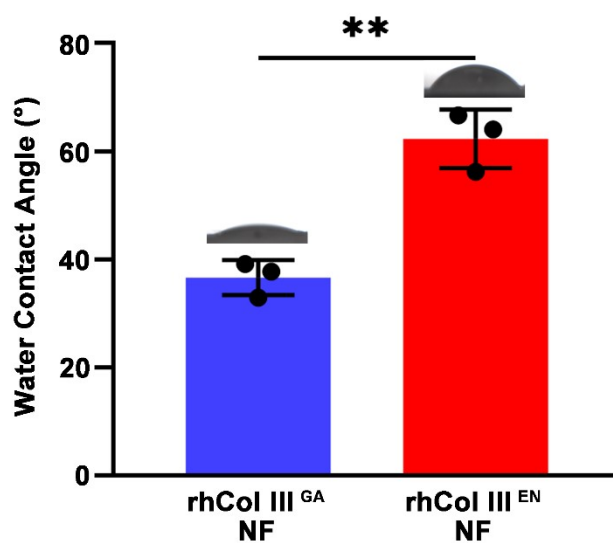

**Figure S7.** Water contact angle of membranes.
